# Supplementary material for: PAN-AMPK activator O304 improves glucose homeostasis and microvascular perfusion in mice and type 2 diabetes patients
Source: JCI journal article supplement (doi:10.1172/jci.insight.99114), 2018-06-20
Supplement: sd1 [file 1]

## Supplemental data

# PAN-AMPK activator O304 improves glucose homeostasis and microvascular perfusion in mice and type2 diabetes patients

**Authors:** Pär Steneberg, Emma Lindahl, Ulf Dahl, Emmelie Lidh, Jurate Straseviciene, Fredrik Backlund, Elisabet Kjellkvist, Eva Berggren, Ingela Lundberg, Ingela Bergqvist, Madelene Ericsson, Björn Eriksson, Kajsa Linde, Jacob Westman, Thomas Edlund, and Helena Edlund\*

\* Corresponding author. E-mail: [helena.edlund@umu.se](mailto:helena.edlund@umu.se)

1. Supplemental figures
2. Supplemental tables
3. Supplemental Methods
4. Supplemental References

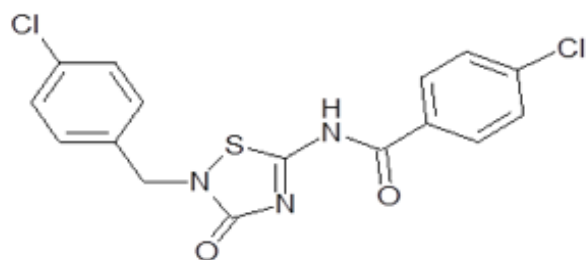

**Supplemental figure 1. Chemical structure of O304.**

**Figure S2.**

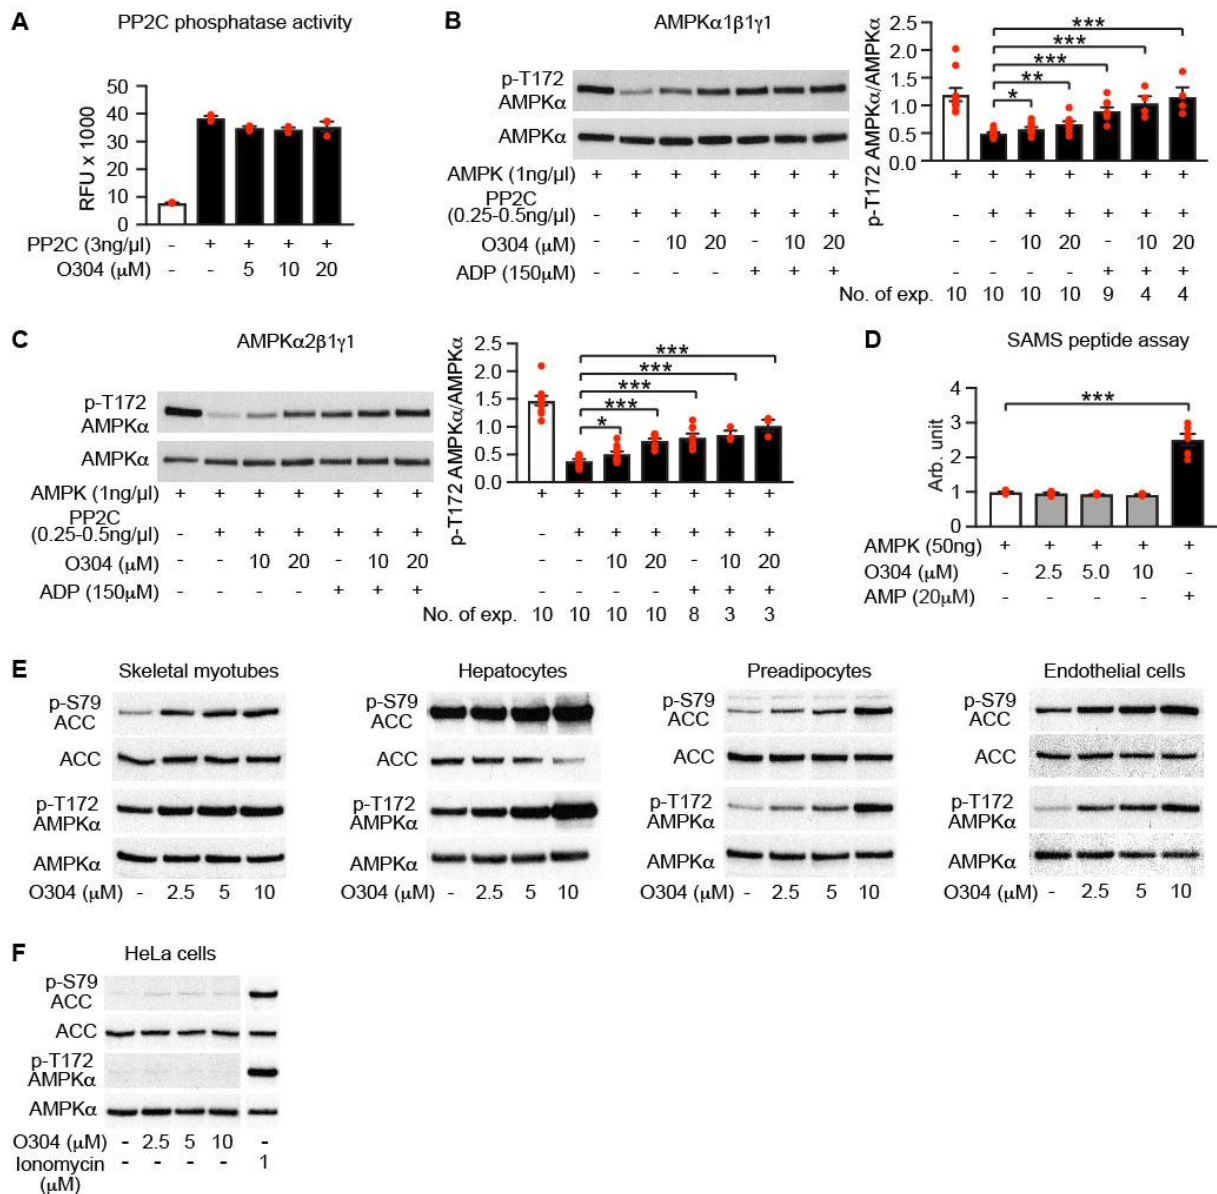

**Supplemental figure 2. O304 does not inhibit PP2C activity or allosterically activate AMPK and enhances AMPK activity in a variety of primary human cells.** (A) PP2C phosphatase activity in presence of indicated concentrations of O304 (n=3). (B and C) Representative immunoblot analysis and quantification of O304 dose dependent increase of p-T172 AMPK phosphorylation of α1β1γ1 (B) and α2β1γ1 (C) trimers, respectively, in presence and absence of 150μM ADP as indicated (n=as indicated in figure) (D) SAMS peptide assay under conditions as indicated (n=4). (E) Immunoblot analysis of O304 dose-dependent increase of p-T172 AMPK and p-S79 ACC phosphorylation in human skeletal myotubes (n=1), human hepatocytes (n=1), primary human preadipocytes (n=2) and human umbilical vein endothelial cells (n=1). (F) Representative immunoblot analysis of p-T172 AMPK and p-S79 ACC phosphorylation in HeLa cells treated with O304 or ionomycin (n=1 for each condition) as indicated. Data are presented as mean±SEM, \*p<0.05, \*\*p<0.01, \*\*\*p<0.001, (two-tailed Student *t* test).

**Figure S3.**

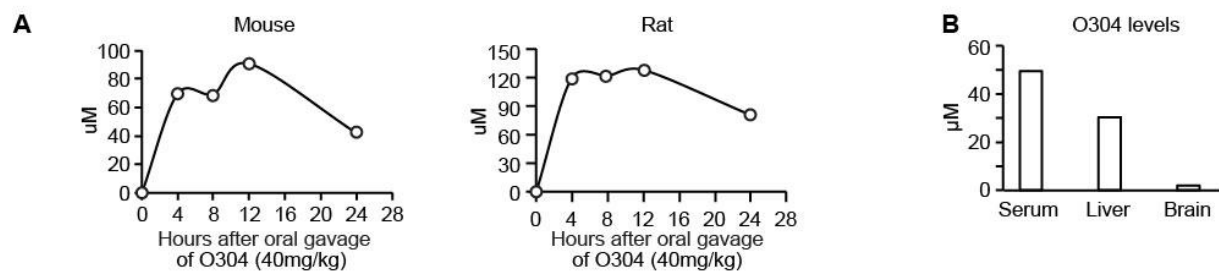

**Supplemental figure 3. O304 is orally available but does not cross the blood-brain barrier.**

(A) Plasma levels of O304 following oral gavage of 40 mg/kg O304 in B6 mice (pooled plasma from 3 independent mice) and NTac:SD rats (pooled plasma from 4 independent rats). (B) O304 concentrations in rat serum, liver, and brain following oral gavage (n=1).

**Figure S4.**

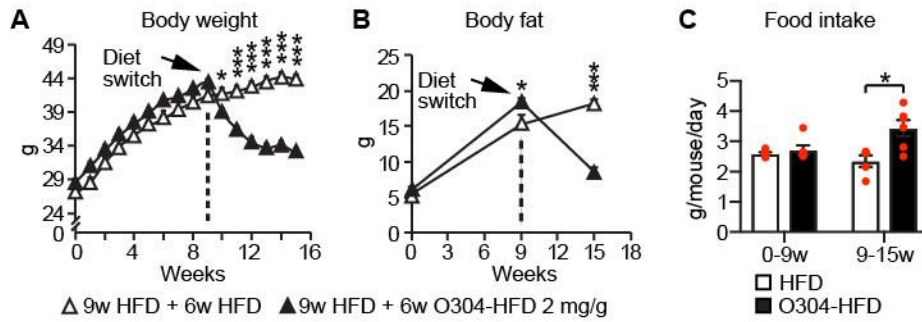

**Supplemental figure 4. O304 reduces obesity in *hIAPPtg* diet-induced obese mice. (A-C)** Body weight (A) and body fat (B) change, and food intake (C) in *hIAPPtg* mice on high fat diet (HFD) for 15w (n=10) and in mice on HFD for 9w and then switched to O304-HFD (2 mg/g) for an additional 6w (n=12). Data are presented as mean±SEM, \*p<0.05, \*\*\*p<0.001, (two-tailed Student *t* test).

**Figure S5.**

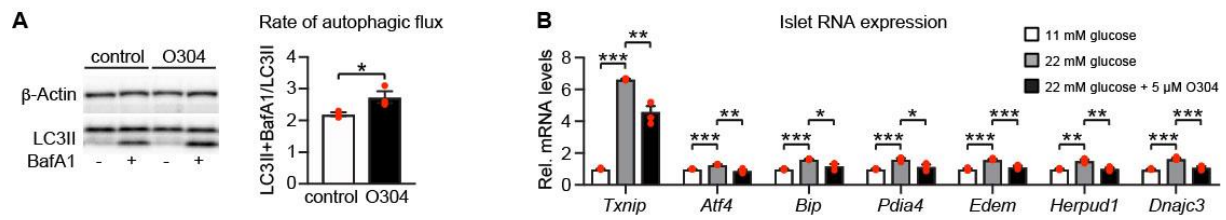

**Supplemental figure 5. O304 enhances autophagic flux in INS-1 cells and attenuates high glucose induced unfolded protein response (UPR) gene expression in *ex vivo* cultured primary mouse islets.** (A) Representative immunoblot analysis and quantification of LC3II levels, in the absence or presence of Bafilomycin A1 (BafA1), in untreated (control) and O304 (5 μM) treated INS-1 cells (n=3 per condition). (B) qRT-PCR mRNA levels of the indicated UPR genes in isolated primary mouse islets *ex vivo* cultured in 11 mM glucose, 22 mM glucose, and 22 mM glucose + 5 μM O304 (n=4 for each condition) for 96 hrs. Data are presented as mean±SEM, \*p<0.05, \*\*p<0.01, \*\*\*p<0.001, (two-tailed Student *t* test).

**Figure S6.**

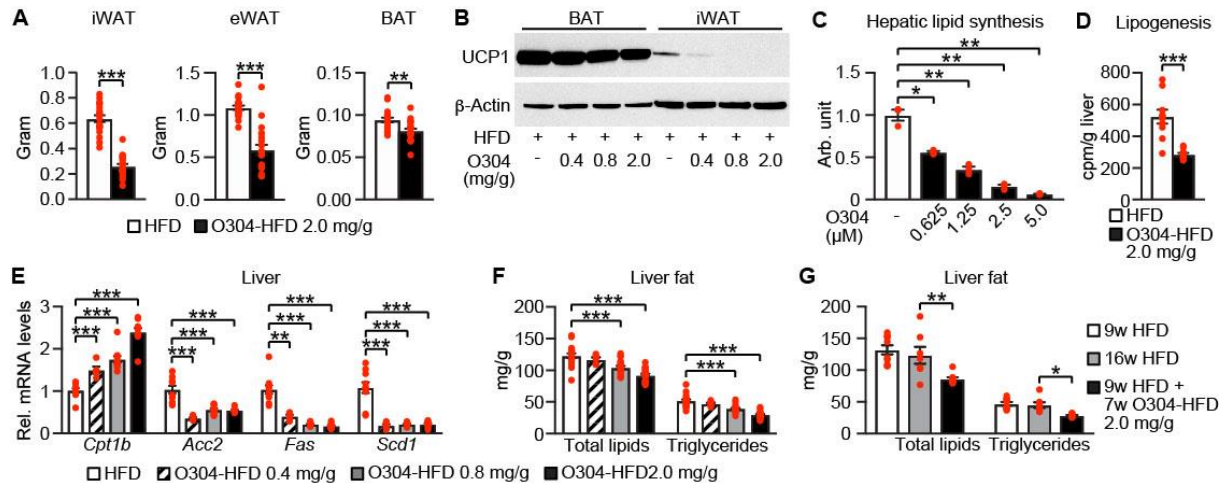

**Supplemental figure 6. O304 reduces white adipose tissue (WAT) depots, hepatic lipogenesis, and fatty liver development in diet-induced obese mice.** (A) Average weights of isolated inguinal WAT (iWAT), epididymal WAT (eWAT), and brown adipose tissue (BAT) from CBA mice on high fat diet (HFD) (n=20) and O304-HFD (2 mg/g) O304 (n=20) for 7w. (B) Representative immunoblot analysis of UCP1 expression in BAT and iWAT in CBA mice on HFD (pooled samples from n=10 mice) and O304-HFD with 0.4 (pooled samples from n=5 mice), 0.8 (pooled samples from n=10 mice), or 2 mg/g (pooled samples from n=10 mice) O304 for 7w. (C) Lipid synthesis in human primary hepatocytes treated with O304 as indicated (n=3 per condition). (D) *In vivo* lipogenesis in livers of CBA mice fed HFD (n=10) or O304-HFD (2 mg/g), (n=10) for 5w. (E) Relative mRNA levels of *Cpt1b*, *Acc2*, *Fas*, and *Scd1* in livers of CBA mice on HFD (n=10) and O304-HFD with 0.4 (n=5), 0.8 (n=10), and 2 mg/g (n=10) O304 for 7w. (F) Liver lipid content and triglyceride content in CBA mice on HFD (n=20) and O304-HFD with 0.4 (n=5), 0.8 (n=20), and 2 mg/g (n=20) O304 for 7w. (G) Liver lipid content and triglyceride content in CBA mice on 9w HFD (n=10), 16w HFD (n=6), and 9w HFD+7w O304-HFD (2mg/g), (n=9). Data are presented as mean $\pm$ SEM, \*p<0.05, \*\*p<0.01, \*\*\*p<0.001, (two-tailed Student *t* test).

**Figure S7.**

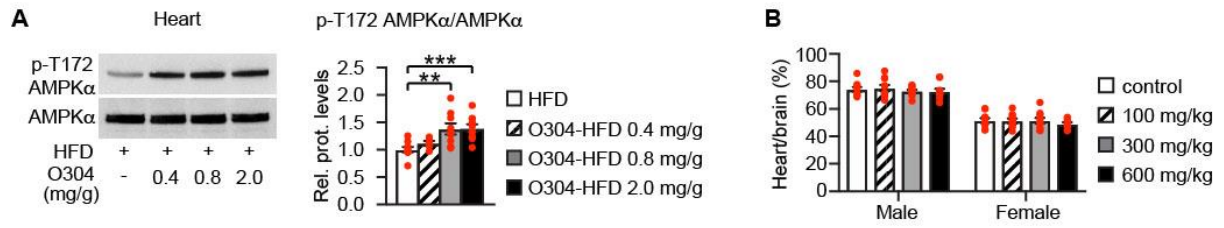

**Supplemental figure 7. (A) O304 increases p-T172 AMPK cardiac expression in diet-induced obese mice but does not increase heart weight in rats.** Representative immunoblot analysis and quantification of p-T172 AMPK levels in heart of mice fed high fat diet (HFD) (n=10) and O304-HFD with 0.4 (n=5), 0.8 (n=10), or 2 mg/g (n=10) O304 for 7w. **(B)** Heart weights in male and female Wistar rats fed regular diet and gavaged with either vehicle (control) (n=10 for each gender), O304 100 mg/kg/day (n=10 for each gender), 300 mg/kg/day (n=10 for each gender), or 600 mg/kg/day (n=10 for each gender) for 6 months. Data are presented as mean $\pm$ SEM, \*\*p<0.01, \*\*\*p<0.001, (two-tailed Student *t* test).



Figure S8.

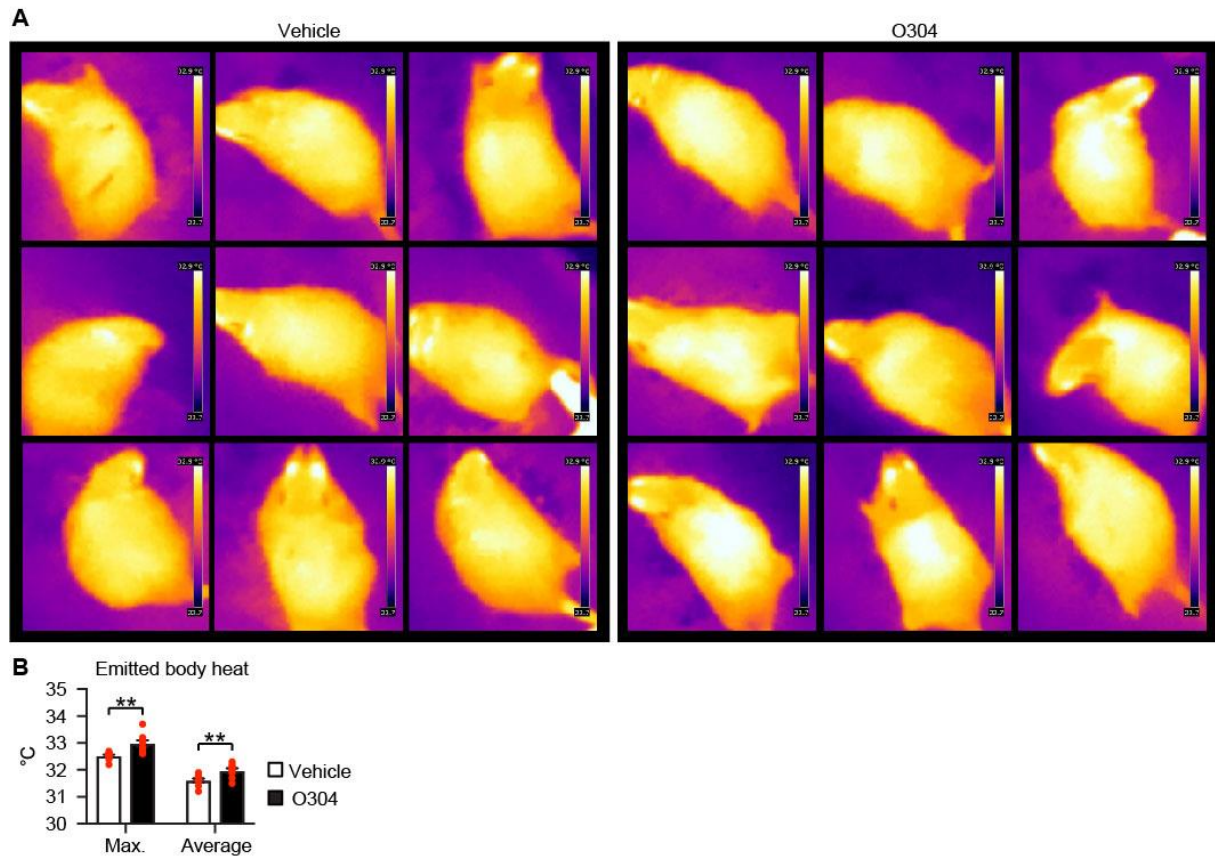

**Supplemental figure 8. Infrared thermography of O304 and vehicle treated rats. (A)** Infrared thermal images of Zucker rats treated with O304 (10 mg/kg/day) or vehicle for 12 days. **(B)** Body surface temperatures of rats treated with O304 (10 mg/kg/day) (n=9) or vehicle (n=9) for 12 days. Data are presented as mean±SEM, \*\*p<0.01, (two-tailed Student *t* test).

**Figure S9.**

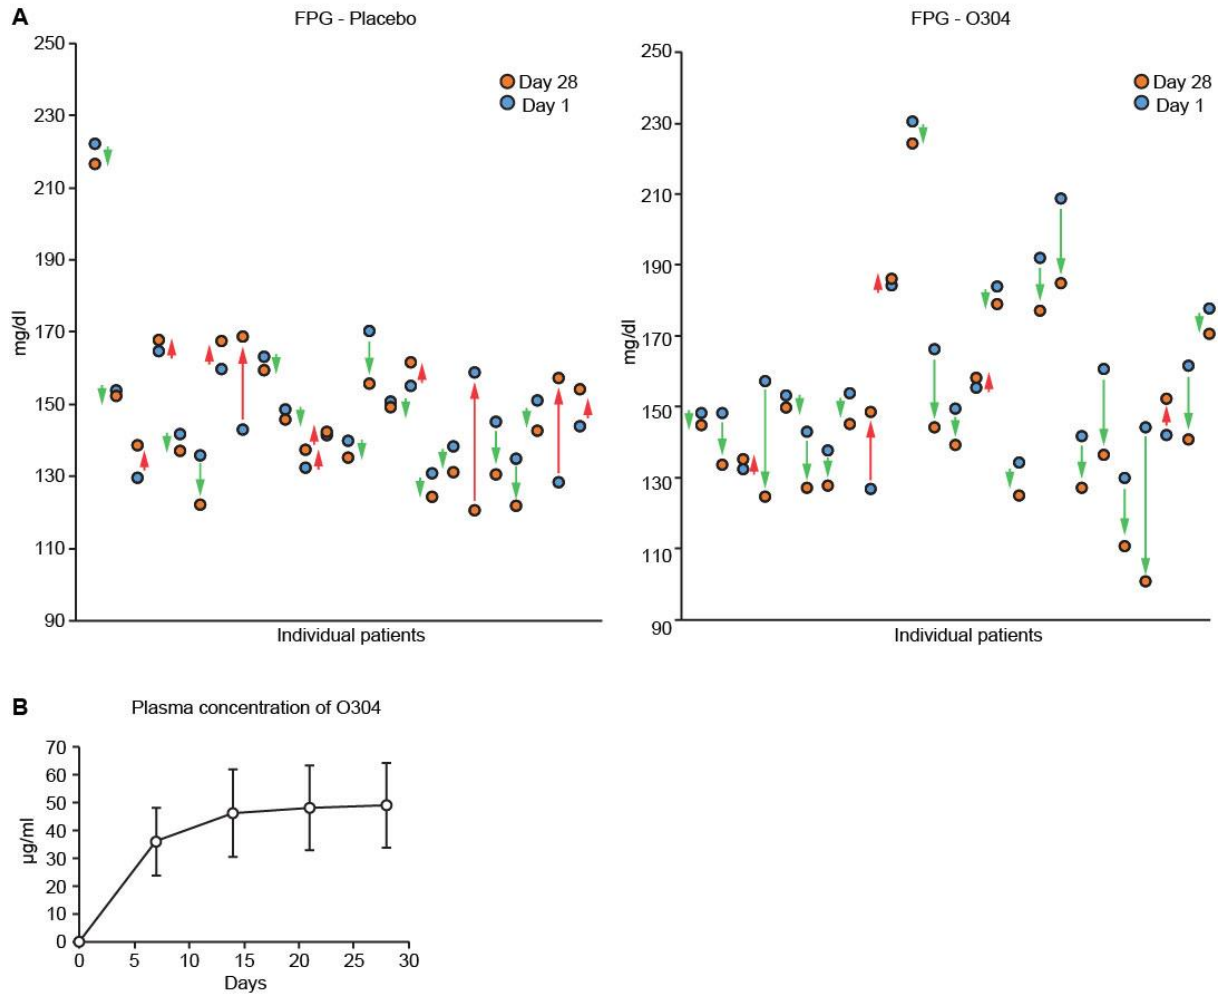

**Supplemental figure 9. Fasting plasma glucose (FPG) and O304 plasma levels in type 2 diabetes (T2D) patients of the Phase IIa TELLUS study. (A) Individual FPG levels in T2D patients at day 1 and 28. (B) Plasma concentrations of O304 in T2D patients during the 28d study. Error bars in (B) indicate standard deviation (SD).**

**Supplemental Table 1. Cell lines and islets**

| Cell line/islets                                                      | Growth conditions                                                                                                                                                                                                                                                                               | O304 activation condition                                                                                                                                                                                                                                                                                                                                                                                    |
|-----------------------------------------------------------------------|-------------------------------------------------------------------------------------------------------------------------------------------------------------------------------------------------------------------------------------------------------------------------------------------------|--------------------------------------------------------------------------------------------------------------------------------------------------------------------------------------------------------------------------------------------------------------------------------------------------------------------------------------------------------------------------------------------------------------|
| Human Preadipocytes (Cell Applications, Inc. #802h-05a)               | Preadipocyte growth medium (Cell Applications, Inc. #811-500)                                                                                                                                                                                                                                   | Cells were treated (in the presence of 0.1% DMSO) with 2.5, 5 or 10 $\mu$ M O304 in serum free DMEM (Gibco #21885) for 4.5 hours                                                                                                                                                                                                                                                                             |
| Human skeletal muscle cells (Cell Applications, Inc. #150-05a)        | Growth Medium (Cell Applications, Inc. #151-500)                                                                                                                                                                                                                                                | Cells were treated (in the presence of 0.1% DMSO) with 2.5, 5 or 10 $\mu$ M O304 in serum free DMEM (Gibco #21885) for 4 hours                                                                                                                                                                                                                                                                               |
| Wi-38 human lung fibroblast cells (LGC Promochem-ATCC #CCL-75)        | DMEM (Gibco #21885), glucose 1g/L, 10% FBS (Gibco #10500-064), 1mM MEM NEAA (Gibco #11140-035), 25 $\mu$ g/ml gentamicin (Gibco #15750)                                                                                                                                                         | Cells were treated (in the presence of 0.1% DMSO) with 2.5, 5 or 10 $\mu$ M O304 in serum free DMEM (Gibco #21885) for 16 hours to analyze AMPK activation and 16 hours to analyze ATP content.                                                                                                                                                                                                              |
| Human hepatocytes (Gibco #HMC PMS)                                    | Resuspended and plated in Williams' medium E (Gibco #A1217601) supplemented with hepatocyte plating supplement pack (Gibco #CM3000).                                                                                                                                                            | Cells were treated (in the presence of 0.1% DMSO) with 2.5, 5 or 10 $\mu$ M O304 in serum free Williams' medium E (Gibco #A1217601) for 2 hours (for western) or with 0.625, 1.25, 2.5 or 5 $\mu$ M O304 in serum free Williams' medium E (Gibco #A1217601) for 2+4 hours ([1,2- <sup>14</sup> C] acetate incorporation)                                                                                     |
| Human umbilical vein endothelial cells (Lonza #CC-2519)               | EBM (Lonza #CC-3121) supplemented with EGM singleQuot kit Suppl. and growth factor (Lonza #CC-4133)                                                                                                                                                                                             | Cells were treated (in the presence of 0.1% DMSO) with 2.5, 5 or 10 $\mu$ M O304 in serum free EBM for 16 hours                                                                                                                                                                                                                                                                                              |
| Insulinoma 1 (INS-1E) (AddexBio #C0018009)                            | RPMI medium 1640 (GIBCO #21875-034), 11.1 mM glucose (GIBCO #A24940-01), 10% fetal bovine serum (GIBCO #10500), 1mM sodium pyruvate (GIBCO #11360-039), 10mM Hepes (Umeå University, Laboratory medicine), 0.1% 2-Mercaptoethanol (Sigma #M3148), 50U; $\mu$ g/ml Pen;Strep (Gibco #15140-122), | Cells were treated (in the presence of 0.1% DMSO) with 2.5, 5.0 and 10 $\mu$ M O304 in RPMI medium (GIBCO #11879), 11.1 mM glucose (GIBCO #A24940-01), 1x MEM NEAA (Gibco #11140-050), 10mM Hepes (Umeå University, Laboratory medicine), 1mM sodium pyruvate (GIBCO #11360-039), 0.1% 2-Mercaptoethanol (Sigma #M3148), 50U; $\mu$ g/ml Pen;Strep (Gibco #15140-122), 1x N-2 (GIBCO #17502-048) for 2 hours |
| HeLa cells (kind gift from Prof. Erik Lundgren, CMB, Umeå University) | DMEM (Gibco #21885), glucose 1g/L, 10% FBS (Gibco #10500-064), 1mM MEM NEAA (Gibco #11140-035), 25 $\mu$ g/ml gentamicin (Gibco #15750)                                                                                                                                                         | Cells were treated (in the presence of 0.1% DMSO) with 2.5, 5 or 10 $\mu$ M O304 in serum free DMEM (Gibco #21885) for 4 hours. 1 $\mu$ M Ionomycin were added the last 20 minutes to control cells as it activates AMPK.                                                                                                                                                                                    |
| Mouse islets                                                          | RPMI medium (GIBCO #11879), 1% fetal bovine serum (GIBCO #10500), 11.1 mM glucose (GIBCO #A24940-01), 10mM Hepes (Umeå University, Laboratory medicine), 1mM sodium pyruvate (GIBCO #11360-039), 0.1% 2-Mercaptoethanol (Sigma #M3148), 50U; $\mu$ g/ml Pen;Strep (Gibco #15140-122)            | Islets were treated (in the presence of 0.1% DMSO) with 2.5, 5.0 and 10 $\mu$ M O304 in serum free RPMI medium supplemented as described for growth conditions for 2 hours                                                                                                                                                                                                                                   |
| Human islets                                                          | CMRL medium 1066 (GIBCO #21530-027), 10% fetal bovine serum (GIBCO #10500), 20U; $\mu$ g/ml Pen;Strep (Gibco #15140-122) and 1X GlutaMax (Gibco #35050-038)                                                                                                                                     | Islets were treated (in the presence of 0.1% DMSO) with 1.0, 2.5, 5.0 and 10 $\mu$ M O304 in CMRL medium 1066, serum free, supplemented as described for growth conditions for 4 hours                                                                                                                                                                                                                       |
| Rat L6 skeletal muscle cells (Cat No. CRL-1458, LGC Promochem-ATCC)   | Dulbecco's Modified Eagle Medium (Gibco #31966)                                                                                                                                                                                                                                                 | N/A                                                                                                                                                                                                                                                                                                                                                                                                          |

## Supplemental Table 2. Antibodies

|                      | Antigen                                                      | Species | Supplier                                         | Dilution-Condition                                           |
|----------------------|--------------------------------------------------------------|---------|--------------------------------------------------|--------------------------------------------------------------|
| Primary antibodies   | p-AMPK $\alpha$ (Thr-172)                                    | Rabbit  | Cell Signaling (cat.nr. 2535)                    | 1/500-3000 (depending on cell line/tissue), TBST + 5% BSA    |
|                      | panAMPK $\alpha$                                             | Rabbit  | Cell Signaling (cat.nr. 2532)                    | 1/2000-20 000 (depending on cell line/tissue), TBST + 5% BSA |
|                      | GAPDH                                                        | Rabbit  | Cell Signaling (cat.nr. 2118)                    | 1/50 000, TBST + 5% BSA                                      |
|                      | p-ACC (Ser-79)                                               | Rabbit  | Cell Signaling (cat.nr. 3661)                    | 1/500-3,000 (depending on cell line/tissue), TBST + 5% BSA   |
|                      | ACC                                                          | Rabbit  | Cell Signaling (cat.nr. 3662)                    | 1/500-2 000 (depending on cell line/tissue), TBST + 5% BSA   |
|                      | ATGL                                                         | Rabbit  | Cell Signaling (cat.nr. 109251)                  | 1/70 000, TBST + 5% BSA                                      |
|                      | p-S406 ATGL                                                  | Rabbit  | Cell Signaling (cat.nr. 135093)                  | 1/2000, TBST + 5% BSA                                        |
|                      | UCP-1                                                        | Rabbit  | Abcam (cat. Nr.23841)                            | 1:100 000, TBST + 5 %BSA                                     |
|                      | LC3B                                                         | Rabbit  | Cell signaling (cat. nr. 2775)                   | 1:500, TBST + 5% BSA                                         |
|                      | $\beta$ -Actin                                               | Rabbit  | Cell Signaling (cat.nr. 4967)                    | 1/1000-5000 (depending on tissue), TBST + 5% BSA             |
| secondary antibodies | peroxidase-conjugated Affini-pure Goat Anti-Rabbit IgG (H+L) |         | Jackson Laboratories, INC. (cat.nr. 111-035-003) | 1/10 000, TBST + 5% non-fat dried milk                       |

## Supplemental Table 3. Primers

| Experiment | Target                            | Forward primer            | Reverse Primer               |
|------------|-----------------------------------|---------------------------|------------------------------|
| qRT-PCR    | <i>Fas</i>                        | TCCTGGAACGAGAACACGATCT    | GAGACGTGTCCTCTGGACT          |
|            | <i>Scd-1</i>                      | AGTGAGGCGAGCAACTGACTA     | GGTGGTGGTGGTCGTGTAAGA        |
|            | <i>Acc2</i>                       | CCCAGGAGGCTGCATTGAAC      | ACGCGACGGTAAAATCTCTG         |
|            | <i>Cpt1b</i>                      | AGATCAAGCCGGTCATGGCA      | TTGCCTGGGATGCGTGTAGT         |
|            | <i>Glut1</i>                      | ATCCCAGCAGCAAGAAGG        | CCAGTGTATAGCCGAACGTG         |
|            | <i>TXNIP</i>                      | ATCTTTATGTACGCCCTGA       | GGATCCACCTCAGTGTAAGT         |
|            | <i>Atf4</i>                       | GGAATGGCCGGCTATGG         | TCCCGAAAAGGCATCCT            |
|            | <i>Bip</i>                        | TTCAGCCAATTATCAGCAAACCTCT | TTTTCTGATGTATCCTCTTACCAGT    |
|            | <i>Pdia4</i>                      | TGACCCGGCCTACTTGCA        | GTGTGGTGAAACTGTGAATCTTCTCTCA |
|            | <i>Edem2</i>                      | ACTTGGGAGAGACGCTGTGG      | GGAGGTCCTTGATCGTGGCA         |
|            | <i>Herpud1</i>                    | CATGTACCTGCACCACGTCG      | GAGGACCACCATCATCCGG          |
|            | <i>Dnajc3</i>                     | GACAGCTAGCCGACGCCTTA      | GTCACCATCAACTGCAGCGT         |
|            | <i>Tbp</i>                        | GAATTGTACCGCAGCTTCAAAA    | AGTGCAATGGTCTTTAGGTCAAGTT    |
|            | <i>Ywhas</i>                      | CTGCGTGACATCTGCAACGA      | GGTTGCGAAGCATTGGGGAT         |
|            | <i>Atgl</i>                       | TCACCATCCGCTTGTGGA        | TGCTACCCGTCTGCTCTTTTCA       |
|            | <i>Cd36</i>                       | TCATATTGTGCTTGCAAATCCAA   | GCTTTACCAAAGATGTAGCCAGTGT    |
|            | <i>Acc1</i>                       | AGCCAGACATGCTGGATCTCAT    | TGGGGATCTTGGCTTACAGG         |
|            | <i>Ppargc1<math>\alpha</math></i> | CCGTAAATCTGCGGGATGATG     | CAGTTTCGTTCGACCTGCGTAA       |
|            | <i>Cox8b</i>                      | GTTCACAGTGGTCCCAAAG       | AACGACTATGGCTGAGATCC         |

## Supplemental Experimental Procedures

### Study design

For animal experiments, no sample-size estimate was calculated before the study was executed. The experiments were not randomized unless otherwise stated. Investigators were not blinded to allocation during experiments and outcome assessment except during some measurements and quantifications (glucose tolerance test, glucose stimulated insulin secretion, arginine stimulation of insulin secretion, amyloid quantification, echocardiography, and ultrasound examination of the heart). For *in vivo* data, each *n* value corresponds to a single mouse. For amyloid quantification each *n* value corresponds to independent experiments and total number of islets investigated, respectively. For *in vitro* data, each *n* value corresponds to an independent experiment. If technical replicates were performed, then their mean was considered as  $n = 1$

### O304

O304 is a small heterocyclic compound developed by Betagenon AB. O304 was developed through rationale design from an early hit molecule identified in a cellular screen and belongs to the 4th generation of AMPK activators scaffolds developed by Betagenon AB (1). O304 used in the study was synthesised and purified by Anthem Bioscience Pvt. Ltd. (Bangalore, India) for Baltic Bio AB (Umeå, Sweden) and Betagenon AB (Umeå, Sweden). For cell culture assays O304 were dissolved in DMSO Hybri-Max™ (Sigma, #D2650). For *in vivo* assays O304 were dissolved in 2% w/v methylcellulose, 4 mM phosphate buffer pH 7.4. Metformin (Sigma #D150959) was dissolved in in 2% w/v methylcellulose, 4 mM phosphate buffer pH 7.4.

Pharmacokinetics of O304 in C57BL/6JBomTac mice and NTac:SD rats was determined via UHPLC-ESI Triple Quad MSMS in plasma from non-fasted animals. O304 (40 mg/kg O304)

was administered via oral gavage and 4-, 8-, 12- and 24-hours after administration blood was collected. O304 levels were determined in liver and brain from non-fasted CrI:CD(SD) rats administered O304 (40 mg/kg O304), once daily for 3 weeks, via oral gavage. O304 was extracted in acetonitrile and levels determined using UHPLC-ESI Triple Quad MSMS.

No severe adverse effects (SAEs) occurred in a clinical phase I single ascending dose (SAD) and multiple ascending dose (MAD) study at 100 to 2400 mg daily doses of O304, nor in the TELLUS study. During single and multiple dose escalation, increased frequency or intensity of events by dose or by treatment (O304/placebo) were not observed. Most of the AEs reported after start of study treatment were of mild intensity in the phase I and TELLUS studies. No clinically significant abnormal physical examination findings were reported at any of the time-points assessed in the SAD or the MAD part of the phase I study, nor in the TELLUS study. There were no remarkable mean changes over time or individual clinically significant abnormal values with regard to any of the vital signs or ECG parameters or for any of the safety laboratory parameters analysed in the phase I and TELLUS studies. No individual abnormal laboratory values were assessed as clinically significant in either study.

## **Animals**

Female CrI:CD(SD) rats (Strain #001), male and female Wistar rats (Strain #003), and Zucker CrI:ZUC-Lepr<sup>fa</sup> rats (Strain #185) were obtained from Charles River Lab. Female NTac:SD rats were obtained from Taconic. Male C57BL/6J (B6) mice were obtained from JAX mice (Jax #000664). Male C57BL/6JBomTac mice were obtained from Taconic (B6JBom). Male B6CBAF1/J (F1) mice were obtained from JAX mice (Jax #10011). CBA/CaCrI (CBA) mice were obtained from Charles River Lab (Charles River CBA/CaCrI). hIAPP<sup>tg</sup> mice were obtained from JAX mice (Jax #008232) and maintained by brother sister mating as well as by

back-cross to CBA for more than 10 generations. Wild type littermates were used as controls for *hIAPP*<sup>tg</sup> mice.

14-15 weeks old male B6 were, based on starting weight, assigned into vehicle, Metformin, O304, and Metformin+O304 treatment groups (100 mg/kg, orally once a day), 10 animals/group, and fed HFD throughout the 8 weeks experimental period.

7 weeks old male B6 were fed HFD for 7 weeks after which they, based on weight, were assigned into O304, and Metformin+O304 treatment groups (100 mg/kg, orally once a day), and fed HFD for an additional 4 weeks.

12 weeks old CBA mice were randomized into a HFD and three O304-HFD groups (0.4 mg/g, 0.8 mg/g, and 2 mg/g) for 7 weeks. 16-17 weeks old CBA mice on regular diet was used as controls where indicated.

14 weeks old CBA mice were randomized into HFD and O304-HFD (2 mg/g) groups for 2 weeks while housed at 22°C. The two groups were then switched from HFD to O304-HFD and vice versa for an additional 4.5 weeks before transferred from 22°C to 30°C (thermoneutrality). After one week at 30°C the diet was switched again and one week after the switch core body temperature were determined.

10-11 weeks old male *hIAPP*<sup>tg</sup> mice were randomized into vehicle and O304 treatment groups (100 mg/kg, orally once a day) and fed HFD throughout the 6 weeks experimental period.

10-11 weeks old male *hIAPP*<sup>tg</sup>;CBA mice and wild type littermates were fed HFD for 9 weeks. After 9 weeks mice were either sacrificed or randomized into two groups either continuing on HFD or switched to O304-HFD (2 mg/g) for an additional 7 weeks.

8-10 weeks old Wistar male and female rats were treated by oral gavage with vehicle or O304 at 100, 300 or 600 mg/kg/day for 6 months.

Animals were housed at 12:12 hour light/dark cycle in a temperature/humidity controlled (22°C/50%humidity) room and ad libitum feeding with either standard chow (Special Diet Service #801730), high fat diet (HFD) (Research diets, Inc. #D12492) or HFD (Research diets, Inc. #D12492) custom formulated with O304 at 2mg/g O304, 0.8mg/g O304 and 0.4mg/g O304, respectively.

### **Cardiovascular Safety Pharmacology Study Using Radiotelemetry in Conscious**

#### **Beagle Dogs Following a Single Oral Gavage**

Telemetry analyses was performed by CiToxLAB North America (Laval, Quebec, Canada) in adult male beagle dogs, selected from CiToxLAB North America Dog Telemetry Colony, which had previously undergone surgery for telemetry transmitter implantation to monitor the arterial blood pressure, electrocardiogram, body temperature and locomotor activity (Data Science International, Model D70-PCT). All surgical procedures were performed in accordance with relevant Standard Operating Procedures. A telemetry transmitter was placed between the internal abdominal oblique muscle and the aponeurosis of the transverses abdominis of each animal. The pressure catheter was inserted into the femoral artery and the biopotential leads subcutaneously in a Lead II configuration. O304 was gavaged as a suspension at 60,180, or 540 mg/kg.



### **Food control, Body weight and Composition**

Food intake was measured weekly by giving each cage 200 g pellet. After one week, the amount of pellets consumed were calculated and adjusted according to the number of animals/cage. Body weight was measured weekly. Body composition was assessed using EchoMRI.

### **Echocardiography**

Left ventricle structure and function were analyzed with transthoracic, high-frequency echocardiography using the MS550D transducer. The examination was performed during light isoflurane anesthesia (1.5-2.0 % in 800 mL oxygen). Anesthesia level was adjusted to keep the respiration rate at 80-110 breaths per minute. Left ventricular volumes were determined in B-mode using a Simpson's rule reconstruction. All images were analyzed off-line in a blinded way using the Vevo LAB software 1.7.0. Stroke volume, cardiac output and heart rate were analyzed, as well as wall thicknesses and left ventricle diameter. Three measurements/animal was performed for mean values.

### **Laser Doppler Imaging**

9 weeks old F1 mice were fed HFD for 8 weeks and treated with either vehicle or O304 (40 mg/kg, orally once a day). Veet hair removal cream was used to remove hair from the left hind limb one day prior to blood perfusion analysis. Mice were anaesthetized using isoflurane and placed on a heating pad. Blood perfusion was scanned using a PeriScan PIM II Images and LDPIwin software (version 2.6.1) was used to analyze the images.

### **Treadmill**

For treadmill test 14 months old C57BL/6J mice with comparable running distance to exhaustion were assigned to two groups (14 animals/group) prior to treatment with either vehicle or O304 (20 mg/kg, orally once a day) for 30 days. One week prior to the test mice went through a familiarization session of 5 minutes on the treadmill. Running protocol as follows: 15 minutes at 18.8 m/minute, 5 minutes at 24.4 m/minute and 27.1 m/minute until exhaustion. At exhaustion, blood lactate levels were measured using a lactate test meter (Arkray).

### **Indirect Calorimetry Measurements**

21 weeks old CBA mice that had been on HFD or HFD formulated with 0.8mg/g for 11w were individually housed in the chamber with a 12-h light/12-h dark cycle in ambient temperature of 22°C and allowed a minimum of 12 hours to acclimate to the chamber before data collection. VO<sub>2</sub> and VCO<sub>2</sub> rates were measured during 3 days by indirect calorimetry in TSE PhenoMaster Calorimetry metabolic cages (TSE Systems GmbH). The respiratory exchange ratio (RER) was calculated as a ratio of VCO<sub>2</sub> produced/VO<sub>2</sub> consumed. An RER of 0.7 indicates that fat is the predominant fuel source, while an RER closer to 1.0 indicates that carbohydrate is the primary fuel. Energy expenditure (EE) was calculated as the product of the calorific value (CV) of oxygen [ $=3.815 + (1.232 \times \text{RER})$ ] and the volume of O<sub>2</sub> consumed, i.e.  $[\text{EE} = \text{CV} \times \text{VO}_2 \text{ (kcal/h)}]$  and related to lean weight.

### **Infrared thermal imaging**

Skin temperature of non-sedated Zucker rats that had been treated with O304 (10 mg/kg/day) or vehicle for 12 days was recorded with an infrared camera (FLIR ix series Extech IRC30, FLIR systems Inc.) and analysed with a specific software package (FLIR QuickReport version 1.2 SP2 (1.0.1.217)). 9 rats per group was used and mean and maximum skin surface temperatures were measured for each animal 2 hours after final dose administration.

## **Glucose and Serum Related Measurements**

Oral and intraperitoneal glucose tolerance tests combined with glucose stimulated insulin secretion were performed on 6 hours fasted non-sedated mice following i.p. injection of glucose (SIGMA #G7021) (0.75 g/kg body weight). Arginine-stimulated insulin secretion was determined following i.p. injection of arginine (SIGMA #A5131) (1g/kg body weight) in non-fasted 21 weeks old CBA mice that had been on HFD or O304-HFD (0.8 mg/g) for 11w. Blood glucose was measured using Glucometer (Ultra 2, One Touch) and plasma insulin analysed via the ultrasensitive mouse insulin ELISA kit (Chrystal Chem Inc. #90080). Area under the Curve (AUC) was calculated according to the trapezoid rule. The homeostasis model for insulin resistance (HOMA-IR) was calculated via:  $\text{fasting blood glucose (mmol/L)} \times \text{fasting plasma insulin } (\mu\text{U/L}) / 22.5$ . MATSUDA index was calculated via:  $[10000 / \sqrt{(\text{insulin (0 min)} + \text{glucose (0 min)} + \text{insulin mean (0-60 min)} + \text{glucose mean (0-60 min)})}]$ . Statistical significance was calculated via Student t-test (two-tailed).

## **Autophagic Flux Assay**

INS-1E cells were incubated for 24 h with or without 5  $\mu\text{M}$  O304 in the presence or absence of 100 nM Bafilomycin A1 (InvivoGen #tlrl-baf1) during the last 60 min of incubation. Levels of LC3II were determined by Western blot analysis and quantified. Primary and secondary antibodies used are listed in (Supplemental Table 2).

## **Amyloid Analyses and *Ex Vivo* Islet Amyloid Assay**

Islets amyloid was quantification was done on pancreatic tissues isolated from *hIAPP*<sup>tg</sup> mice on HFD for 16 weeks (n=7 mice/n=69 islets) and *hIAPP*<sup>tg</sup> mice on HFD for 9 weeks then switched to O304-HFD (2 mg/g) for 7 weeks (n=5 mice/n=48 islets). Isolated pancreases was

direct frozen, sectioned, and amyloid content quantified by staining with Thioflavin-S as previously described (3). For *ex vivo* analyses, islets were isolated by collagenase digestion of the pancreas (2) and cultured in RPMI medium 1640 (GIBCO #11879-0) supplemented with 11.1 or 22.2 mM glucose (GIBCO #A24940-01), 1% fetal bovine serum (GIBCO #10500), 50U;µg/ml Pen/Strep (Gibco #15140-122), 10 mM HEPES (Umeå University, Laboratory medicine), 1 mM sodium pyruvate (GIBCO #11360-039) and 0.1% 2-Mercaptoethanol (Sigma #M3148). 0, 2.5, 5.0, and 10 µM O304 were added from day 0 of culture. For assessing the effect of autophagy inhibition, 3-Methyladenine (3-MA, Aldrich #M9281), 5 µM, was added from day 0 of culture in combination with O304, 5 µM. The control contained DMSO 1:2000. Medium and compounds were changed every second day. After 92 hours of treatment islets were embedded, sectioned and amyloid content quantified by staining with Thioflavin-S as previously described (3). A minimum of 3 independent experiments was evaluated.

### **Determination of Cellular ATP Content**

Wi-38 human lung fibroblast cells were stimulated with O304 for 16 hours. Thereafter ATP content were determined with the ATP bioluminescence assay kit HS II (Roche Applied Science #11699709001) according to manufacturer's recommendations. The ATP data were normalized to cellular protein determined using BCA protein assay kit (Pierce #23225).

### **Western Blot Analysis**

All cell lines were lysed in 0.1 M Tris-HCl, pH 6.8, 2% SDS, 10 mM sodium fluoride (SIGMA #S7920), 10 mM β-glycerophosphate (SIGMA #G6376), and 1 mM sodium vanadate (SIGMA #72060) and supernatant collected after 1 minute at 14,000 rpm. Islets (human and mouse) were lysed in 0.1 M Tris-HCl, pH 6.8, 2% SDS, protease inhibitor (Roche #04 693 124 001) and phosphatase inhibitor (Roche #04 906 837 001). Right calf muscle, heart, iWAT, and

interscapular BAT was crushed in a pestle using liquid nitrogen and homogenized in ice cold RIPA buffer (150 mM sodium chloride (SIGMA #S7653), 1.0% NP40 (USB), 0.5% sodium deoxycholate (SIGMA #D6750), 0.1% SDS, 50 mM Tris pH 8.0, 20 mM sodium pyrophosphate (SIGMA #71515), 10 mM sodium fluoride, 10 mM  $\beta$ -glycerolphosphate, 1 mM sodium vanadate and protease inhibitor cocktail (Roche #04693124001), 1 tablet/10 ml lysis buffer). The supernatant was collected after 2 min at 14,000 rpm. This procedure was repeated until all fat was eliminated and the supernatant was clear, at 4°C. Samples were analyzed on 4-15% polyacrylamide gels. Primary and secondary antibodies used are listed in (Supplemental Table 2). Values were normalized toward AMPK $\alpha$ ,  $\beta$ -Actin, GAPDH or the respective non-phosphorylated counterpart.

### **qRT-PCR**

For RNA purification calf muscle, iWAT, interscapular BAT, and left lateral liver lobe was crushed in a pestle using liquid nitrogen before turning to respective RNA kit. RNA from liver was prepared using Total RNA isolation Nucleospin II Kit (Macherey-Nagel #740955.50). RNA from adipose tissue was prepared using RNeasy Lipid Tissue Mini kit (Qiagen #74804). RNA from calf muscle tissue was prepared using RNeasy Fibrous Tissue Mini kit (Qiagen #74704). First strand cDNA synthesis was done using SuperScript III (First-Strand Synthesis SuperMix for qRT-PCR, Invitrogen #11752-250) according to the manufacturer's instructions. Total RNA was prepared from isolated islets using RNeasy Micro Kit (Qiagen #74004) and first strand cDNA synthesis was done using Superscript III (Invitrogen #18080-051) according to the manufacturer's instructions. Quantification of mRNA expression levels was performed essentially as previously described (4). Primers used for qRT-PCR are listed in Supplemental Table 3. Tyrosine 3-monooxygenase/tryptophan 5-monooxygenase activation protein, zeta

polypeptide (YWHAS) was used to normalize expression levels except for islets where TBP was used.

### **Liver Lipid Extraction and Triglyceride Determination**

0.2-0.3 g of liver was homogenized in 3 ml PBS before addition of 6 ml chloroform/methanol (2:1). Samples were mixed until phase separation no longer occurred and left at RT 30 minutes before centrifuged, 4,500 rpm, 5 minutes. The chloroform phase was transferred into pre-weighted glassware and kept at 4°C O/N. Any water drops were removed and the chloroform evaporated by a stream of nitrogen before residual solvent was removed via SpeedVac, 15 minutes. The glassware was re-weighed, and total lipids calculated (mg/g liver). The residue was dissolved in 35% Triton X-100/methanol. Liver triglycerides were determined with a Serum Triglyceride Determination Kit (Sigma-Aldrich #TR0100). Analyses were done according to the manufacturer's recommendations with a minor modification for triglyceride determination, which was analyzed at 560 nm instead of 540 nm.

### **Glycogen Determination**

Heart glycogen content was determined using a Glycogen Assay Kit (Abcam #ab65620) according to the manufacturer's recommendations.

### **[1,2-<sup>14</sup>C] Acetate Incorporation into Total Lipids**

Primary human hepatocytes (65,000-130,000 cells/well in 24-well dishes) were treated with vehicle control, 0.625, 1.25, 2.5 or 5 μM O304 in serum free Williams' medium E, 2 hours, before addition of 0.25 μCi [1,2-<sup>14</sup>C]-acetate/well for an additional 4 hours. See Supplementary Table 1 for growth conditions. 200 μl 0.5% trypsin was used to detach the cells before addition of 800 μl chloroform/methanol (2:1) and 500 μl 4 mM MgCl<sub>2</sub>. The samples were vortexed and

spun at 14,000 rpm, 2 minutes before discarding the aqueous layer. The procedure was repeated twice, first with 700  $\mu$ l chloroform/methanol (2:1) and 500  $\mu$ l 4 mM  $MgCl_2$  and then 400  $\mu$ l chloroform/methanol (2:1) and 500  $\mu$ l 4 mM  $MgCl_2$ . The organic phase was transferred into a scintillation vial and evaporated to dryness by a stream of nitrogen. The residue was dissolved in 3 ml liquid scintillation cocktail (Optiphase HiSafe 3, Perkin Elmer #1200.437) and  $^{14}C$  determined for 1 minute in a Wallac 1414 beta counter (Perkin Elmer). Before lipid extraction, 10  $\mu$ l samples were used to determine protein concentration.  $^{14}C$ -values were normalized to cellular protein concentration.

### ***In vivo* Lipogenesis**

15 weeks old CBA mice that had been on HFD or O304-HFD (2 mg/g) for 5 weeks were starved overnight and refed 90 minutes before injection with 1000  $\mu$ Ci  $^3H$ -NaOac (Perkin Elmer #NET003005MC) diluted in 0.9% NaCl. After 90 minutes 0.2-0.3 g liver were isolated and homogenized in 3 ml PBS before addition of 6 ml chloroform/methanol (2:1). Samples were mixed until phase separation no longer occurred and left at RT 30 minutes before centrifuged, 4,500 rpm, 5 minutes. The water phase was removed and 3 ml chloroform transferred to a scintillation vial and evaporated to dryness by a stream of nitrogen while standing in a 40°C water bath. The residue was dissolved in 3 ml optiphase hisafe 3 (Perkin Elmer #1200.437) and  $^3H$  determined for 1 minute in a Wallac 1414 counter.  $^3H$  values were normalized to liver weight.

### **Glucose Uptake in L6 Myotubes**

Rat L6 skeletal muscle cells grown in high-glucose (4.5 g/L) Dulbecco's Modified Eagle Medium (Gibco #31966), 10% fetal bovine serum (Gibco #10500-064) and 25  $\mu$ g/ml gentamicin (Gibco1#5750) were induced to differentiate, by reducing the serum concentration

to 2% for 14 days by which time the majority of myoblast had differentiated to myotubes. Myotubes were rinsed in serum-free low-glucose (1 g/L) DMEM (Gibco #21885), treated with vehicle control, 2.5, 5 and 10  $\mu$ M O304 (serum-free low-glucose DMEM, 0.1% DMSO) for 2 hours, rinsed in serum-free DMEM w/o glucose (Gibco #11966) and thereafter incubated with the same for 20 minutes before addition of 1  $\mu$ Ci 2-Deoxy-D-glucose (2-DG) (Perkin Elmer #NET549A250UC) for 10 minutes. The cells were rinsed 3 times in serum-free DMEM w/o glucose and lysed in 1 ml RIPA buffer (150mM Sodiumchloride, 1% NP40, 0.5% Sodiumdeoxycholate, 0.1% SDS, 50 mM Tris pH8.0). 300  $\mu$ l were added to 4 ml liquid scintillation cocktail (Perkin Elmer #1200-437) before counted, 1 minute, in a Wallac 1414 beta counter. CPM was converted to arbitrary units by setting vehicle control as 1.

L6 myotubes were transfected with siAMPK $\alpha$ 1 and  $\alpha$ 2 (Santa Cruz Biotechnology, Inc #sc-270142 and #sc-155985) or Silencer Negative Control siRNA (Ambion #AM4635) 6-7 days after starting differentiation, using lipofectamin RNAiMAX Transfection Reagent (Thermo Fisher Scientific #13778030) according to manufacturer's instructions (forward transfection). The final concentration of siRNA was set at 100nM. The day before transfection the medium was changed to antibiotic-free medium (high-glucose, 4.5 g/L, Dulbecco's Modified Eagle Medium (Gibco #31966) and 2% fetal bovine serum (Gibco #10500-064). The level of AMPK $\alpha$ 1 and  $\alpha$ 2 expression in cells transfected with siAMPK $\alpha$ 1 and  $\alpha$ 2 and Silencer Negative Control siRNA, respectively was quantified by Western blot. Glucose uptake in the absence or presence of O304 (5  $\mu$ M) for 4h was assayed 72 hours after transfection as described above. Glucose uptake induced by O304 was normalized to that of vehicle control in cells transfected with siAMPK $\alpha$ 1 and  $\alpha$ 2 and Silencer Negative Control siRNA, respectively.

### ***In Vivo* Glucose Uptake**



12 weeks old CBA mice that had been on HFD or O304-HFD (2 mg/g) for 2 weeks were starved for 3 hours and then intravenously injected with  $9 \pm 1.1$  MBq of clinical grade  $^{18}\text{F}$ -Fluoro-Deoxy-Glucose ( $^{18}\text{F}$ -FDG) (prepared at the Nuclear Medicine department at Norrlands University Hospital, Umeå) in saline in a total volume of 70-100  $\mu\text{L}$ , during light isoflurane anaesthesia (1.5-2% in 800 mL/min  $\text{O}_2$ ). Mice were allowed to be awake and freely moving around in their cage after injection. After 180 minutes, mice were sacrificed under deep isoflurane anaesthesia and blood was removed by retrograde perfusion of PBS via the aorta. When the liver was pale, tissues were collected and scanned for a 10 minutes static uptake (nanoScan PET/CT, Mediso, Hungary). The tissues were then scanned ex vivo scanning to assess uptake in the isolated tissues. Images were reconstructed to a 0.4 x 0.4 mm resolution with a 3D iterative reconstruction with 4 iterations and 4 subsets (Mediso Tera-Tomo 3D), covering 98 mm axial distance, employing spike filter, delayed-window random correction, scatter and CT-based attenuation corrections. Volumes of interest were manually delineated over each tissue using imlook4d ([www.dicom-port.com](http://www.dicom-port.com)). Tracer uptake was quantified as standardized uptake values (SUV), using the formula:  $\text{SUV} = C / (I / m)$ ; with C being the measured tissue activity concentration (Bq/mL), I the injected dose (Bq), and m the body weight (g). C and I are decay corrected to the same time.

### **SAMS Peptide AMPK Activity Assay**

50 ng AMPK (Upstate #14-305) was mixed in various combination with 2.5, 5 or 10  $\mu\text{M}$  O304 or 20  $\mu\text{M}$  AMP (Sigma #A2002) in buffer (40 mM Hepes pH7.45, 0.5 mM DTT, 2 mM  $\text{MgCl}_2$ , 0.1% DMSO). In all settings 10  $\mu\text{g}$  SAMS and 0.03  $\mu\text{Ci}/\mu\text{l}$   $^{32}\text{P}$  ATP (Perkin Elmer #NEG502Z500UC) were added. Total reaction volume was 25  $\mu\text{l}$ , all components mixed on ice and the reaction carried out at 37°C, 15 minutes, before terminated with 5  $\mu\text{l}$  phosphoric acid, and placed back on ice. 25  $\mu\text{l}$  reaction were dried in on Whatman P81 filters, 50°C, 2 minutes,

washed 3 times in 250 ml 1% phosphoric acid, 2 minutes, before added to 4 ml liquid scintillation cocktail (Perkin Elmer #1200-437) and counted, 1 minute, in a Wallac 1414 beta counter. The radioactivity correlates to enzyme activity.

### **AMPK Activation Assay**

Table 3 contain origin of cell lines, growth conditions and settings for activation of AMPK via O304. Human skeletal muscle cells were grown in growth medium obtained from the supplier of the cells until induction of myotube differentiation in DMEM (Gibco #21885) supplemented with 2% horse serum (Gibco #26050-070) for two days and thereafter treated with O304 as described in Table 3. Upon arrival, human hepatocytes were thawed for 1 minute at 37°C before transferred into thawing medium (CHRM, Invitrogen #CM7000). After centrifugation, 10 minutes, 100x g at RT, the cell pellet was resuspended in Williams' medium E (Gibco #A1217601) supplemented with hepatocyte plating supplement pack (Gibco #CM3000). The cells were plated onto gelatin coated 60 mm dishes and then incubated overnight before treated with O304 as described in Table 3. INS-1E cells were pre-treated with medium for activation condition (Table 3) for 4 hours before addition of O304. All cell lines were maintained in a humidified incubator at 37°C, 5% CO<sub>2</sub>. Table 3 describes growth conditions and settings for activation of AMPK by O304 in mouse and human islets. After harvest mouse islets were cultured for two days in growth condition medium at 37°C, 5% CO<sub>2</sub> before treatment with O304 for 2 hours. Human islets from non-diabetic and T2D donors were provided through the JDRF award 31-2008-416 ECIT Islet for Basic Research program in compliance with Swedish law and the Ethical board for human research in Umea ([www.epn.se](http://www.epn.se)). Upon arrival, the islets were transferred to 50 ml falcon tubes and left to settle for 5min before removal of the supernatant and addition of culture medium (CMRL medium (GIBCO #21530-027), 10% fetal bovine serum (GIBCO #10500), 20U/ml Pen:Strep (Gibco #15140-122) and 1X GlutaMax (Gibco

#35050-038). Islets were washed with culture medium 3 additional times before transferred to Petri dishes and left to recover overnight in a humidified incubator at 37°C, 5% CO<sub>2</sub> before treatment with O304 for 4 hours

### **AMPK *In Vitro* De-Phosphorylation Assay**

AMPK $\alpha$ 2/ $\beta$ 1/ $\gamma$ 1 trimer (Life Technologies #PV4674, Lot 1261361B) (1 ng/ $\mu$ l) was incubated with 10  $\mu$ M O304, 20  $\mu$ M O304 or 150  $\mu$ M ADP (Sigma #A2754) +/- 1 mM ATP (Sigma #A1852-1VL) in buffer (40 mM Hepes, 0.5 mM DTT, 0.2 mg/ml Gelatin (Sigma #G7041) and 0.4% DMSO), +/- PP2C $\alpha$  (0.25-0.75 ng/ $\mu$ l) (Abcam ab51205-100; Lot GR54133-5) and 5 mM MnCl<sub>2</sub> (total volume 20  $\mu$ l). AMPK $\alpha$ 2/ $\beta$ 1/ $\gamma$ 1 +/- ATP was preincubated with O304 and ADP for 2 minutes at 30°C before addition of PP2C/MnCl<sub>2</sub> to start the dephosphorylation reaction which continued for 10-15 minutes at 30°C. Reactions were terminated by the addition of 0.17% BSA, 13 mM EDTA, 1.3x XT Sample buffer and 0.67%  $\beta$ -Mercaptoethanol in PBS. Samples were placed on ice, 5 minutes, heated at 100°C for 5 minutes and chilled before run on a western gel. All steps were performed in high quality low-protein-binding eppendorf tubes. In a separate experiment 10 $\mu$ M O304, 20  $\mu$ M O304, 150  $\mu$ M ADP alone or the combination of 10  $\mu$ M O304+150  $\mu$ M ADP and 20  $\mu$ M O304+150  $\mu$ M ADP was incubated with 1ng/ $\mu$ l of AMPK $\alpha$ 2/ $\beta$ 1/ $\gamma$ 1 or AMPK $\alpha$ 1/ $\beta$ 1/ $\gamma$ 1 (Life Technologies #PV4672) trimer in buffer (40mM Hepes, 0.5mM DTT, 0.2mg/ml gelatin and 0.4% DMSO) +/- 0.25-0.5 ng/ $\mu$ l PP2C $\alpha$  and 5 mM MnCl<sub>2</sub> or 5mM MgCl<sub>2</sub>. AMPK was sequentially preincubated with O304 and ADP or the combination for 2 minutes at 30°C before sequential addition of PP2C/MnCl<sub>2</sub> or PP2C/MgCl<sub>2</sub> to start the dephosphorylation reaction which continued for 5-15 minutes at 30°C. The reaction was thereafter terminated and analyzed as above.

### **PP2C Phosphatase Activity Assay**

3 ng/ $\mu$ l PP2C $\alpha$  (Abcam ab51205) and 5, 10 or 20  $\mu$ M O304 in buffer (50mM Tris-HCL pH 7.5, 0.1 mM EDTA, 0.5mM DTT, 5 mM MgCl<sub>2</sub>) was used in the Sensolyte FDP protein phosphatase assay kit (Anaspec #71100) according to the manufacturer's instructions to measure the activity of PP2C $\alpha$ . The fluorescence intensity was measured in a Bio Tek Synergy H4 multi-mode microplate reader.

### **Study Design of Phase IIa Clinical Trial**

The TELLUS study is an exploratory proof-of-concept randomised, parallel-group, double-blinded, placebo controlled phase IIa study 28 day study of the first-in-class AMPK activator O304 (1000 mg/day) in T2D patients on Metformin for  $\geq$  3 months. TELLUS is listed in the EudraCT database protocol no. 2016-002183-13. The study was performed in accordance with ethical principles that have their origin in the Declaration of Helsinki and are consistent with International Conference of Harmonization (ICH)/Good Clinical Practice (GCP), European Union (EU) Clinical Trials Directive, and applicable local regulatory requirements. The study protocol was approved by the Regional Ethics Committee in Uppsala, Sweden, Project no/ID O304-2016-02. Before performing any study-related procedures an informed consent form was signed and personally dated by all patients and by the Investigator.

Main inclusion criteria: Male and female patients, 18-80 years of age, with uncomplicated T2D, on stable T2D treatment with Metformin monotherapy for  $\geq$  3 months. HbA1c of  $\geq$ 6.5% and  $\leq$ 9.0%, and not FPG at day 1, was selected as the main inclusion criterion.

Main exclusion criteria: History of myocardial infarction (MI), unstable angina, stroke or transient ischemic attack (TIA). Congestive heart failure defined as New York Heart

Association (NYHA) class III-IV. Any clinically significant abnormalities in physical examination, ECG or clinical chemistry results, as judged by the Investigator.

### **Clinical Study Compound**

A good-manufacturing practice (GMP) batch of 5 kg O304 was manufactured by Anthem BioSciences Pvt.Ltd, Bangalore, Karnataka, India. The suspension is composed of O304 20mg/ml in 2% methylcellulose in phosphate buffer. A 2% methylcellulose suspension that color matched the active product was used as placebo. The O304 and placebo suspensions were manufactured, packaged and labeled by Recipharm Pharmaceutical Development AB, Solna, Sweden.

### **Clinical Methodology**

Sixty-five (65) patients were randomised (1:1) to treatment with either O304 or placebo. A screening visit (Visit 1) was performed within 3 weeks before randomisation and the start of IMP administration. Patients were randomised on Day 1 (Visit 2) and allocated to 28 days' treatment with either O304 or placebo (1:1). Study visits to the clinic were performed 7, 14, 21, 28, 29 and 40 days (Visits 3 to 8) following randomisation and start of treatment. The patients were confined to the research clinic from the evening before Day 1 and Day 28 (Day -1 and Day 27, respectively) to ensure fasting conditions before samples for analyses of FPG were collected. Magnetic Resonance Imaging (MRI) scans after screening but before day 1 and after end of treatment were performed at the University Hospital in Uppsala, Sweden, according to standardized methods. Antaros Medical in Uppsala performed the data analysis. A clinical read of the acquired scans was performed by a radiologist at Antaros Medical. If clinically significant findings were noted by the radiologist, the Investigator was notified of the finding. The Investigator was to evaluate and handle the finding as per standard medical/clinical judgment.

Any findings were reported as either baseline events or adverse events, if they started, or worsened after administration of the first dose of IMP. The method used for assessing microvascular function in the calf muscle, (a proxy for oxygenation), include a dynamic MRI investigation of T2\* determination before during and after reactive hyperemia (5). Sixty five (65) patients were randomized, 32 patients in the placebo group and 33 in the O304 group, and 59 patients completed the study (28 and 31 in the two groups, respectively). HbA1c of  $\geq 6.5\%$  and  $\leq 9.0\%$ , and not FPG at day 1, was used as the inclusion criterion since MRI examinations had to be performed after screen but before day 1. Subsequently, a wide range of FPG values were observed at baseline, both  $< 7$  and  $> 13.3$  mmol/l, ( $< 126$  to  $> 240$  mg/dl) were 13.3 mmol/l (240 mg/dl) represents uncontrolled hyperglycemia, requiring a post hoc statistical analysis of change in FPG at day 28 compared to day 1 in T2D patients with FPG  $> 7$  mM and  $< 13.3$  mM at day 1.

## QUANTIFICATION AND STATISTICAL ANALYSES

Quantification of western blot experiments was performed using Image Lab (Bio-Rad Laboratories version 4.1 build 16) and Image-J Software (version 1.45s). Amyloid content quantification was performed using Image-J software (version 1.49m). All the statistical analyses of *in vitro* and mouse *in vivo* data were performed by two-tailed Students t-tests. We considered a value of  $P < 0.05$  to be statistically significant. Patient data analyses were performed using the mix model Anova test and the non-parametric Wilcoxon Rank Sum test. The composite endpoint was analyzed using Chi-Square, and Fisher's exact test.

## REFERENCES

1. Westman J, Vågberg J, and Hallett A. 13 Jan 2011.
2. Ahren B, Simonsson E, Scheurink AJ, Mulder H, Myrsen U, and Sundler F. Dissociated insulinotropic sensitivity to glucose and carbachol in high-fat diet-induced insulin resistance in C57BL/6J mice. *Metabolism*. 1997;46(1):97-106.

3. Ly PT, Cai F, and Song W. Detection of neuritic plaques in Alzheimer's disease mouse model. *J Vis Exp.* 2011(53).
4. Steneberg P, Rubins N, Bartoov-Shifman R, Walker MD, and Edlund H. The FFA receptor GPR40 links hyperinsulinemia, hepatic steatosis, and impaired glucose homeostasis in mouse. *Cell Metab.* 2005;1(4):245-58.
5. Jacobi B, Bongartz G, Partovi S, Schulte AC, Aschwanden M, Lumsden AB, Davies MG, Loebe M, Noon GP, Karimi S, et al. Skeletal muscle BOLD MRI: from underlying physiological concepts to its usefulness in clinical conditions. *J Magn Reson Imaging.* 2012;35(6):1253-65.
